# Supplementary material for: Constructing sensitive luminescent thermometers via energy transfer in Ce3+ and Eu2+ co-doped Ca8Mg3Al2Si7O28 phosphors
Source: Royal Society of Chemistry journal article supplement (doi:10.1039/d1qm00555c), 2021-01-01
Supplement: d1qm00555c1.pdf [file d1qm00555c1.pdf]

# Constructing Sensitive Luminescent Thermometers via Energy Transfer in Ce<sup>3+</sup> and Eu<sup>2+</sup> Co-Doped Ca<sub>8</sub>Mg<sub>3</sub>Al<sub>2</sub>Si<sub>7</sub>O<sub>28</sub> Phosphors

Rongfu Zhou<sup>a,\*</sup>, Litian Lin<sup>b</sup>, Hongting Zhao<sup>a</sup>, Tingting Deng<sup>a</sup>, Jingwei Li<sup>c</sup>

<sup>a</sup> School of Environmental and Chemical Engineering, Foshan University, Foshan 528225, P. R. China.

<sup>b</sup> Guangdong Province Key Laboratory of Rare Earth Development and Application, Institute of Rare Metals, Guangdong Academy of Sciences, Guangzhou 510651, P. R. China.

<sup>c</sup> School of Chemical Engineering and Technology, Sun Yat-sen University, Zhuhai 519082, P. R. China.

\* E-mail: zhourongfu@fosu.edu.cn (R. Zhou).

## Part A. The details of samples preparations and characterizations

**Preparation.** The analytic reagents CaCO<sub>3</sub>, MgO, Al<sub>2</sub>O<sub>3</sub>, SiO<sub>2</sub>, Na<sub>2</sub>CO<sub>3</sub> and 99.99% pure rare-earth oxides CeO<sub>2</sub> and Eu<sub>2</sub>O<sub>3</sub> were used as starting materials and weighed with the nominal formulas Ca<sub>8-2x-y</sub>Ce<sub>x</sub>Na<sub>x</sub>Eu<sub>y</sub>Mg<sub>3</sub>Al<sub>2</sub>Si<sub>7</sub>O<sub>28</sub> for Ce<sup>3+</sup> and Eu<sup>2+</sup> doped samples. The mixtures were ground thoroughly in an agate mortar, and then moved to alumina crucibles. Ce<sup>3+</sup> and Eu<sup>2+</sup> doped Ca<sub>8</sub>Mg<sub>3</sub>Al<sub>2</sub>Si<sub>7</sub>O<sub>28</sub> samples were pre-fired at 973 K in air atmosphere for 4 h, and annealed at 1593 K for 6 h in CO ambience which was produced from the incomplete combustion of carbon at high temperature. Eu<sup>3+</sup> doped Ca<sub>8</sub>Mg<sub>3</sub>Al<sub>2</sub>Si<sub>7</sub>O<sub>28</sub> sample were weighed with nominal formulas Ca<sub>7.98</sub>Eu<sub>0.01</sub>Na<sub>0.01</sub>Mg<sub>3</sub>Al<sub>2</sub>Si<sub>7</sub>O<sub>28</sub>, and annealed in air atmosphere in the whole preparation. After cooling down to room temperature, the final products were ground into powders for subsequent analyses.

**Characterizations.** The phase purity of the synthetic samples was estimated by powder X-ray diffraction (P-XRD) on a Rigaku D-MAX 2200 VPC X-ray diffractometer of Cu K $\alpha$  ( $\lambda = 1.5418 \text{ \AA}$ ) radiation at 40 kV and 26 mA. The P-XRD data for refinement was

collected with the  $2\theta$  range from  $5^\circ$  to  $110^\circ$  and  $2\theta$  step of  $0.02^\circ$  on a Bruker D8 advanced X-ray diffractometer with a wavelength of  $1.54056 \text{ \AA}$  Cu  $K\alpha$  radiation at 40 kV and 40 mA. Temperature-dependent P-XRD data were also recorded on the Bruker D8 advanced X-ray diffractometer. The Rietveld refinement is performed using the TOPAS - Academic program.<sup>1</sup> The Raman spectra of 77–500 K were measured on an inVia Qontor confocal microscopic Raman spectrometer under the laser excitation of 532 nm. The exact Ce/Eu contents in samples were measured on an Agilent ICP-OES 730. The photoluminescence quantum yields (PLQYs) were recorded by integrated sphere, which was attached in the FLS1000 spectrofluorometer.

The excitation and emission spectra in the VUV-UV range were recorded on the 4B8 beamline of the Beijing Synchrotron Radiation Facility (BSRF).<sup>2</sup> The UV-vis excitation and emission spectra as well as the luminescence decay curves at room temperature (RT) were recorded on an Edinburgh FLS 1000 model spectrometer which was a combined fluorescence lifetime and steady-state, equipped with a cooled housing ( $-20^\circ\text{C}$ ) photomultiplier PMT-900. The 450 W Xenon lamp was used as the excitation source of steady-state excitation and emission spectra. A 150 W nF900 lamp with a pulse width of 1 ns and pulse repetition rate of 40 kHz was used for the measurements of decay curves. The temperature-dependent spectral measurements in the 77–500 K range were performed by mounting the samples in an Oxford cryostat. The emission spectra of 20–450 K were measured in an Edinburgh FLS 920 model spectrometer and an Oxford cryostat with a closed cycle liquid helium apparatus.

## References

- 1 A. A. Coelho. TOPAS Academic, Ver. 4; Coelho Software: 666 Brisbane, Australia, 2007.
- 2 Y. Tao, Y. Huang, Z. Gao, H. Zhuang, A. Zhou, Y. Tan, D. Li, S. Sun. Developing VUV Spectroscopy for Protein Folding and Material Luminescence on Beamline 4B8 at the Beijing Synchrotron Radiation Facility. *J. Synchrot. Radiat.* 2009, **16**, 857-863.

## Part B. Tables and Figures

**Table S1.** Final Refined Structural Parameters of  $\text{Ca}_8\text{Mg}_3\text{Al}_2\text{Si}_7\text{O}_{28}$  Host<sup>h</sup>.

| Atom | Site | x      | y      | z      | Occ.  | $B_{\text{iso}}$ |
|------|------|--------|--------|--------|-------|------------------|
| Ca   | 4e   | 0.3382 | 0.1618 | 0.5094 | 1     | 1.43(5)          |
| Al1  | 2a   | 0      | 0      | 0      | 0.25  | 0.90(9)          |
| Mg   | 2a   | 0      | 0      | 0      | 0.75  | 0.90(9)          |
| Al2  | 4e   | 0.1413 | 0.3587 | 0.9620 | 0.125 | 1.50(0)          |
| Si   | 4e   | 0.1413 | 0.3587 | 0.9620 | 0.875 | 1.50(0)          |
| O1   | 2c   | 1/2    | 0      | 0.1602 | 1     | 1.31(3)          |
| O2   | 4e   | 0.1419 | 0.3581 | 0.2735 | 1     | 1.49(9)          |
| O3   | 8f   | 0.0839 | 0.1711 | 0.8221 | 1     | 1.65(7)          |

<sup>h</sup>  $\text{Ca}_8\text{Mg}_3\text{Al}_2\text{Si}_7\text{O}_{28}$  belongs to tetragonal symmetry with space group  $P\bar{4}2_1m$  (113) and lattice parameters  $a = b = 7.7773(6)$  Å,  $c = 5.0159(4)$  Å,  $Z = 1$ ,  $V = 303.39(4)$  Å<sup>3</sup>.

**Table S2.** CIE Chromaticity Coordinates (X, Y) of Emission Spectra ( $\lambda_{\text{ex}} = 340$  nm; RT) of  $\text{Ca}_{7.98-y}\text{Ce}_{0.01}\text{Na}_{0.01}\text{Eu}_y\text{Mg}_3\text{Al}_2\text{Si}_7\text{O}_{28}$  ( $y = 0-0.09$ ) Samples.

| Concentration (y) | Chromaticity Coordinates (X, Y) |
|-------------------|---------------------------------|
| 0                 | (0.157, 0.049)                  |
| 0.01              | (0.271, 0.365)                  |
| 0.03              | (0.333, 0.528)                  |
| 0.05              | (0.349, 0.565)                  |
| 0.07              | (0.358, 0.578)                  |
| 0.09              | (0.359, 0.578)                  |

**Table S3.** The Detected Content of Ce and Eu in  $\text{Ca}_{7.98-y}\text{Ce}_{0.01}\text{Na}_{0.01}\text{Eu}_y\text{Mg}_3\text{Al}_2\text{Si}_7\text{O}_{28}$  ( $y = 0.03, 0.05, \text{ and } 0.09$ ) Samples<sup>i</sup>.

| Sample                                                                                                                                      | n(Ce <sup>3+</sup> ) (mg/ Kg) | n(Eu <sup>2+</sup> ) (mg/ Kg) |
|---------------------------------------------------------------------------------------------------------------------------------------------|-------------------------------|-------------------------------|
| Ca <sub>7.97</sub> Ce <sub>0.01</sub> Na <sub>0.01</sub> Eu <sub>0.01</sub> Mg <sub>3</sub> Al <sub>2</sub> Si <sub>7</sub> O <sub>28</sub> | 1512.8                        | 1882.9                        |
| Ca <sub>7.95</sub> Ce <sub>0.01</sub> Na <sub>0.01</sub> Eu <sub>0.03</sub> Mg <sub>3</sub> Al <sub>2</sub> Si <sub>7</sub> O <sub>28</sub> | 1835.0                        | 4193.0                        |
| Ca <sub>7.93</sub> Ce <sub>0.01</sub> Na <sub>0.01</sub> Eu <sub>0.05</sub> Mg <sub>3</sub> Al <sub>2</sub> Si <sub>7</sub> O <sub>28</sub> | 1506.6                        | 6743.7                        |
| Ca <sub>7.91</sub> Ce <sub>0.01</sub> Na <sub>0.01</sub> Eu <sub>0.07</sub> Mg <sub>3</sub> Al <sub>2</sub> Si <sub>7</sub> O <sub>28</sub> | 1892.1                        | 10159.5                       |
| Ca <sub>7.89</sub> Ce <sub>0.01</sub> Na <sub>0.01</sub> Eu <sub>0.09</sub> Mg <sub>3</sub> Al <sub>2</sub> Si <sub>7</sub> O <sub>28</sub> | 2023.0                        | 12545.8                       |

<sup>i</sup> The density of Ca<sub>8</sub>Mg<sub>3</sub>Al<sub>2</sub>Si<sub>7</sub>O<sub>28</sub> is 2.9885 g/cm<sup>-3</sup>.

**Table S4.** Fitting Parameters via Inokuti-Hirayama Model for Ca<sub>7.98-y</sub>Ce<sub>0.01</sub>Na<sub>0.01</sub>Eu<sub>y</sub>Mg<sub>3</sub>Al<sub>2</sub>Si<sub>7</sub>O<sub>28</sub> (y = 0.03, 0.05, 0.07 and 0.09) Samples.

| y    | n <sub>a</sub> (m <sup>-3</sup> ) | C <sub>DA</sub> (m <sup>6</sup> /s) | R <sub>adj</sub> <sup>2</sup> |
|------|-----------------------------------|-------------------------------------|-------------------------------|
| 0.03 | 9.35×10 <sup>24</sup>             | 3.59×10 <sup>-45</sup>              | 99.4%                         |
| 0.05 | 1.67×10 <sup>25</sup>             | 4.16×10 <sup>-45</sup>              | 99.1%                         |
| 0.07 | 2.54×10 <sup>25</sup>             | 3.97×10 <sup>-45</sup>              | 98.1%                         |
| 0.09 | 3.92×10 <sup>25</sup>             | 4.08×10 <sup>-45</sup>              | 97.7%                         |

**Table S5.** Fitting Parameters via Yokota-Tanimoto Model for Ca<sub>7.98-y</sub>Ce<sub>0.01</sub>Na<sub>0.01</sub>Eu<sub>y</sub>Mg<sub>3</sub>Al<sub>2</sub>Si<sub>7</sub>O<sub>28</sub> (y = 0.03, 0.05, and 0.09) Samples.

| y    | n <sub>a</sub> (m <sup>-3</sup> ) | C <sub>DA</sub> (m <sup>6</sup> /s) | C <sub>DD</sub> (m <sup>6</sup> /s) | D                      | R <sub>adj</sub> <sup>2</sup> |
|------|-----------------------------------|-------------------------------------|-------------------------------------|------------------------|-------------------------------|
| 0.03 | 9.39×10 <sup>24</sup>             | 3.46×10 <sup>-46</sup>              | 6.15×10 <sup>-47</sup>              | 5.53×10 <sup>-21</sup> | 99.5%                         |
| 0.05 | 1.61×10 <sup>25</sup>             | 4.80×10 <sup>-46</sup>              | 6.21×10 <sup>-47</sup>              | 5.58×10 <sup>-21</sup> | 99.2%                         |
| 0.09 | 4.10×10 <sup>25</sup>             | 4.23×10 <sup>-46</sup>              | 6.27×10 <sup>-47</sup>              | 5.64×10 <sup>-21</sup> | 98.1%                         |

**Table S6.** Lifetime of Ce<sup>3+</sup> and Energy Transfer Efficiency (η) from Ce<sup>3+</sup> to Eu<sup>2+</sup> in Ca<sub>7.98-y</sub>Ce<sub>0.01</sub>Na<sub>0.01</sub>Eu<sub>y</sub>Mg<sub>3</sub>Al<sub>2</sub>Si<sub>7</sub>O<sub>28</sub> Samples at RT.

| y    | τ(Ce <sup>3+</sup> ) (ns) | η (%) <sup>j</sup> |
|------|---------------------------|--------------------|
| 0.01 | 30.1                      | 6.42               |
| 0.03 | 23.6                      | 26.6               |

|      |      |      |
|------|------|------|
| 0.05 | 18.3 | 43.2 |
| 0.07 | 15.1 | 53.2 |
| 0.09 | 13.8 | 57.1 |

$\eta = 100 \times (1 - \tau(\text{Ce}^{3+})/\tau_0)$ , where  $\tau_0$  is the lifetime of isolated  $\text{Ce}^{3+}$  in  $\text{Ca}_8\text{Mg}_3\text{Al}_2\text{Si}_7\text{O}_{28}$ , and is about 32.2 ns.

**Table S7.** CIE Chromaticity Coordinates (X, Y) of Emission Spectra ( $\lambda_{\text{ex}} = 320$  nm) of

$\text{Ca}_{7.97}\text{Ce}_{0.01}\text{Na}_{0.01}\text{Eu}_{0.01}\text{Mg}_3\text{Al}_2\text{Si}_7\text{O}_{28}$  Samples at 77–500 K.

| Temperature<br>(K) | Chromaticity<br>Coordinates (X, Y) | Temperature<br>(K) | Chromaticity<br>Coordinates (X, Y) |
|--------------------|------------------------------------|--------------------|------------------------------------|
| 77                 | (0.368, 0.532)                     | 300                | (0.336, 0.507)                     |
| 100                | (0.367, 0.531)                     | 325                | (0.329, 0.497)                     |
| 125                | (0.365, 0.531)                     | 350                | (0.321, 0.482)                     |
| 150                | (0.363, 0.531)                     | 375                | (0.312, 0.466)                     |
| 175                | (0.360, 0.529)                     | 400                | (0.304, 0.447)                     |
| 200                | (0.355, 0.526)                     | 425                | (0.295, 0.426)                     |
| 225                | (0.350, 0.522)                     | 450                | (0.284, 0.399)                     |
| 250                | (0.346, 0.519)                     | 475                | (0.275, 0.365)                     |
| 275                | (0.341, 0.513)                     | 500                | (0.260, 0.331)                     |

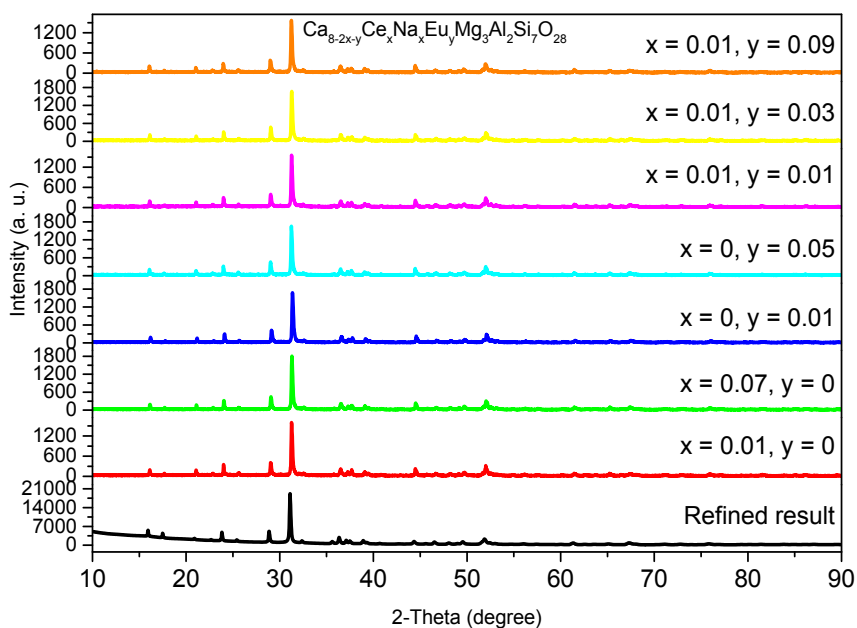

**Fig. S1** Representative P-XRD patterns of  $\text{Ca}_{8-2x-y}\text{Ce}_x\text{Na}_x\text{Eu}_y\text{Mg}_3\text{Al}_2\text{Si}_7\text{O}_{28}$  ( $x = 0, 0.01$  and  $0.07$ ;  $y = 0-0.09$ ) samples and corresponding refined result.

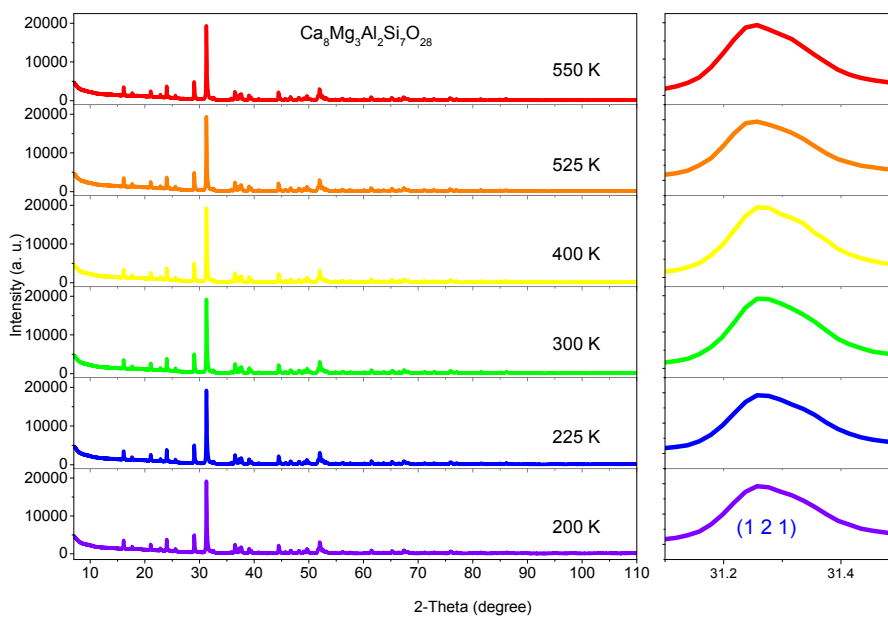

**Fig. S2** Temperature-dependent P-XRD data of synthesized  $\text{Ca}_8\text{Mg}_3\text{Al}_2\text{Si}_7\text{O}_{28}$  sample and magnified P-XRD patterns of  $31.1-31.5^\circ$  ( $2\text{-theta}$ ) range.

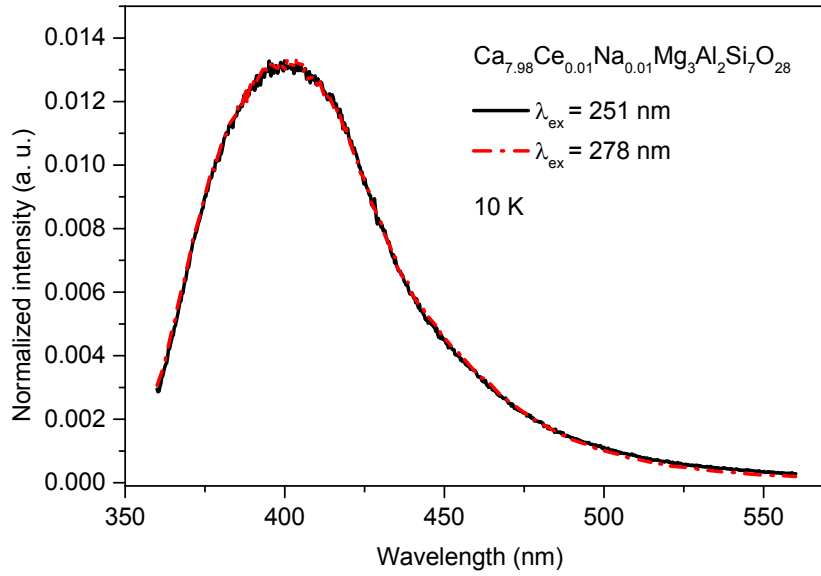

**Fig. S3** Normalized synchrotron radiation emission ( $\lambda_{\text{ex}} = 251$  and  $278$  nm;  $10$  K) spectra of  $\text{Ca}_{7.98}\text{Ce}_{0.01}\text{Na}_{0.01}\text{Mg}_3\text{Al}_2\text{Si}_7\text{O}_{28}$  sample.

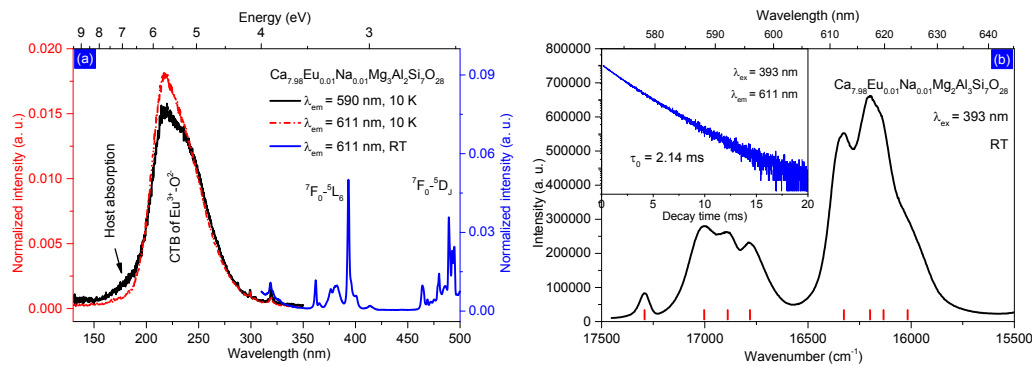

**Fig. S4** (a) Normalized synchrotron radiation VUV-UV excitation ( $\lambda_{\text{em}} = 590$  and  $611$  nm;  $10$  K) and normalized lab UV-vis excitation ( $\lambda_{\text{em}} = 611$  nm; RT) spectra of  $\text{Ca}_{7.98}\text{Eu}_{0.01}\text{Na}_{0.01}\text{Mg}_3\text{Al}_2\text{Si}_7\text{O}_{28}$  sample; (b) emission spectrum ( $\lambda_{\text{ex}} = 393$  nm; RT) of  $\text{Ca}_{7.98}\text{Eu}_{0.01}\text{Na}_{0.01}\text{Mg}_3\text{Al}_2\text{Si}_7\text{O}_{28}$  sample; the inset shows decay curve ( $\lambda_{\text{ex}} = 393$  nm,  $\lambda_{\text{em}} = 611$  nm; RT) of  $\text{Ca}_{7.98}\text{Eu}_{0.01}\text{Na}_{0.01}\text{Mg}_3\text{Al}_2\text{Si}_7\text{O}_{28}$  sample.

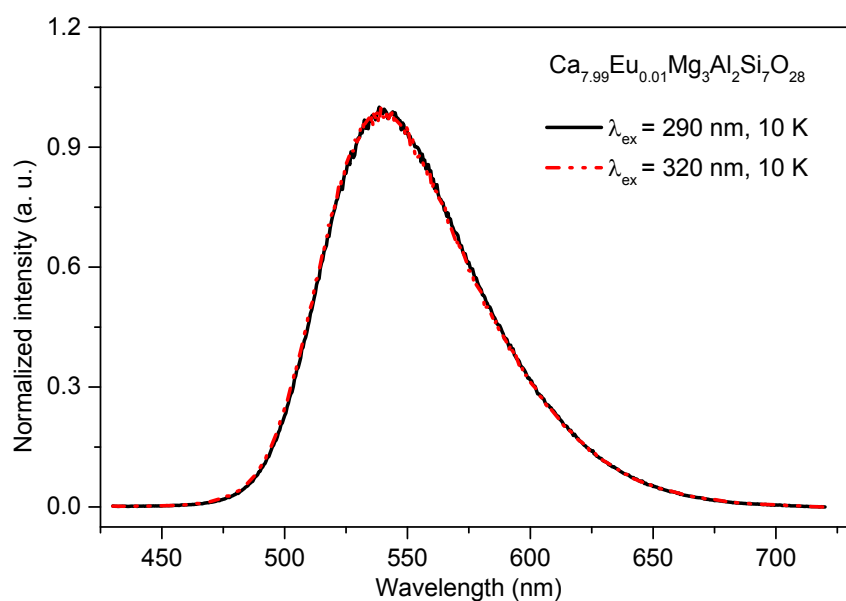

**Fig. S5** Highest-height normalized emission ( $\lambda_{\text{ex}} = 290$  and  $320$  nm;  $10$  K) spectra of  $\text{Ca}_{7.99}\text{Eu}_{0.01}\text{Mg}_3\text{Al}_2\text{Si}_7\text{O}_{28}$  sample under the excitation of synchrotron radiation VUV-UV beamline.

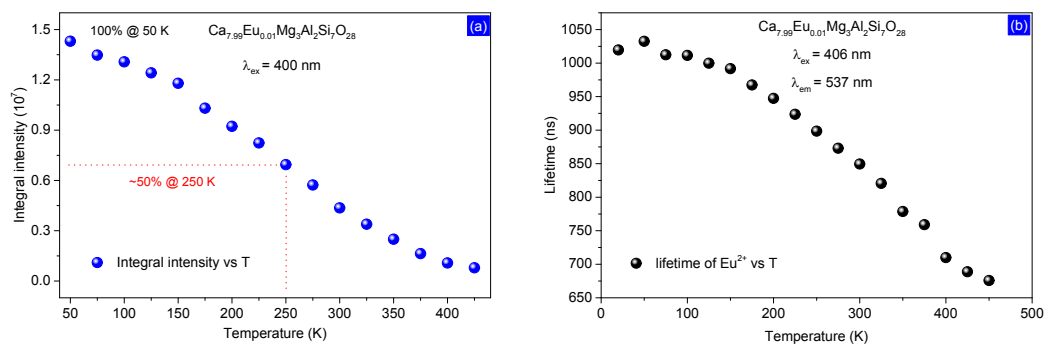

**Fig. S6** Integral intensity (a,  $\lambda_{\text{ex}} = 400$  nm) and lifetime (b,  $\lambda_{\text{ex}} = 406$  nm,  $\lambda_{\text{em}} = 537$  nm) of  $\text{Eu}^{2+}$  emission as a function of temperature in  $\text{Ca}_{7.99}\text{Eu}_{0.01}\text{Mg}_3\text{Al}_2\text{Si}_7\text{O}_{28}$  sample.



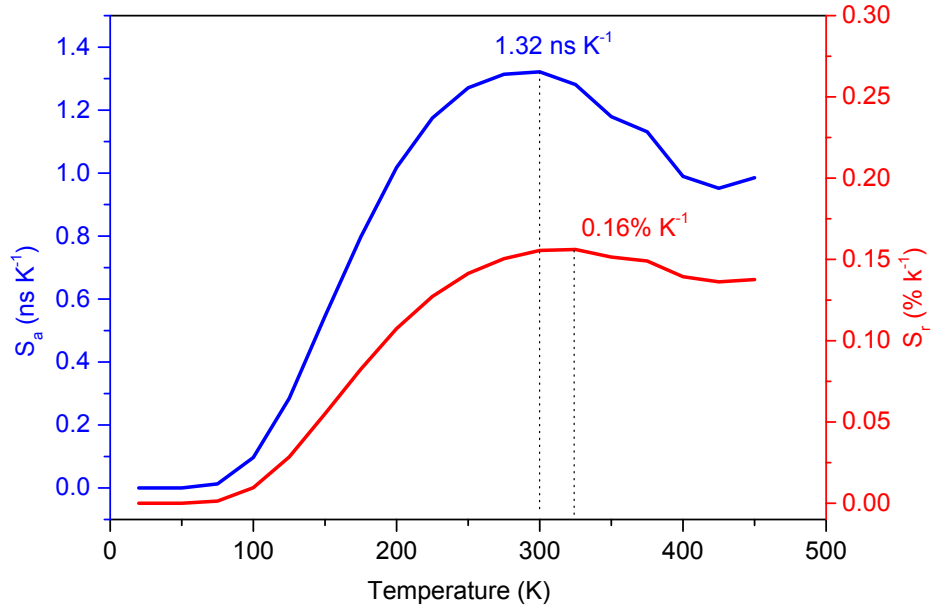

**Fig. S7** Temperature sensitivities  $S_a$  and  $S_r$  values of phosphor  $\text{Ca}_{7.99}\text{Eu}_{0.01}\text{Mg}_3\text{Al}_2\text{Si}_7\text{O}_{28}$  in the temperature range of 50–450 K.

$$S_a = \left| \frac{\partial(\tau)}{\partial(T)} \right| = \frac{E_a}{k_B T^2} \tau^2 k_1 \exp\left(\frac{-E_a}{k_B T}\right) \quad (\text{S1})$$

$$S_r = \left| \frac{\partial(\tau)}{\tau \partial(T)} \right| \times 100\% = \frac{E_a}{k_B T^2} \tau k_1 \exp\left(\frac{-E_a}{k_B T}\right) \times 100\% \quad (\text{S2})$$

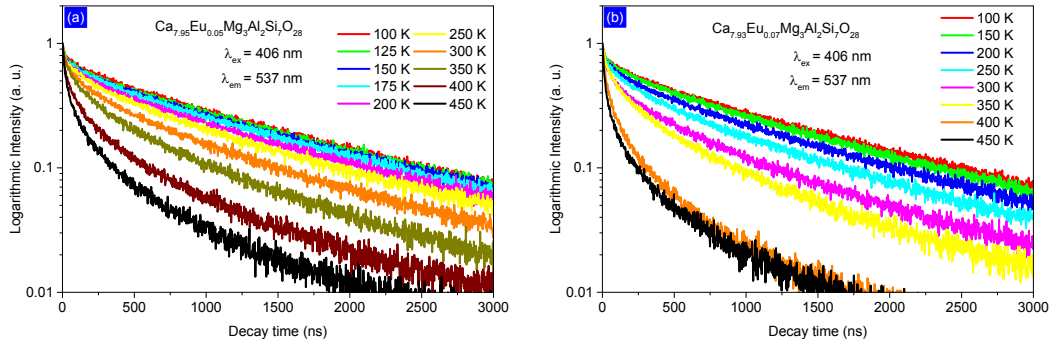

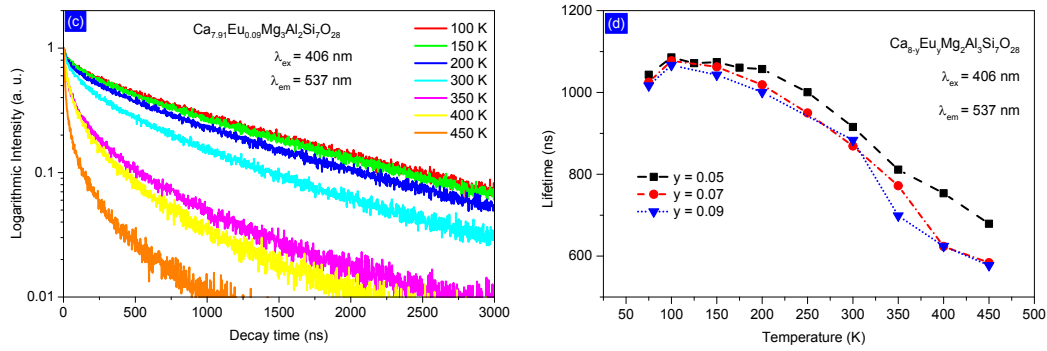

**Fig. S8** (a, b, c) Temperature-dependent decay curves ( $\lambda_{\text{ex}} = 406$  nm,  $\lambda_{\text{em}} = 537$  nm) of  $\text{Ca}_{8-y}\text{Eu}_y\text{Mg}_3\text{Al}_2\text{Si}_7\text{O}_{28}$  (a,  $y = 0.05$ ; b,  $y = 0.07$ ; c,  $y = 0.09$ ) samples at 100–450 K; (d) temperature-dependent lifetime of  $\text{Eu}^{2+}$  in  $\text{Ca}_{8-y}\text{Eu}_y\text{Mg}_3\text{Al}_2\text{Si}_7\text{O}_{28}$  samples.

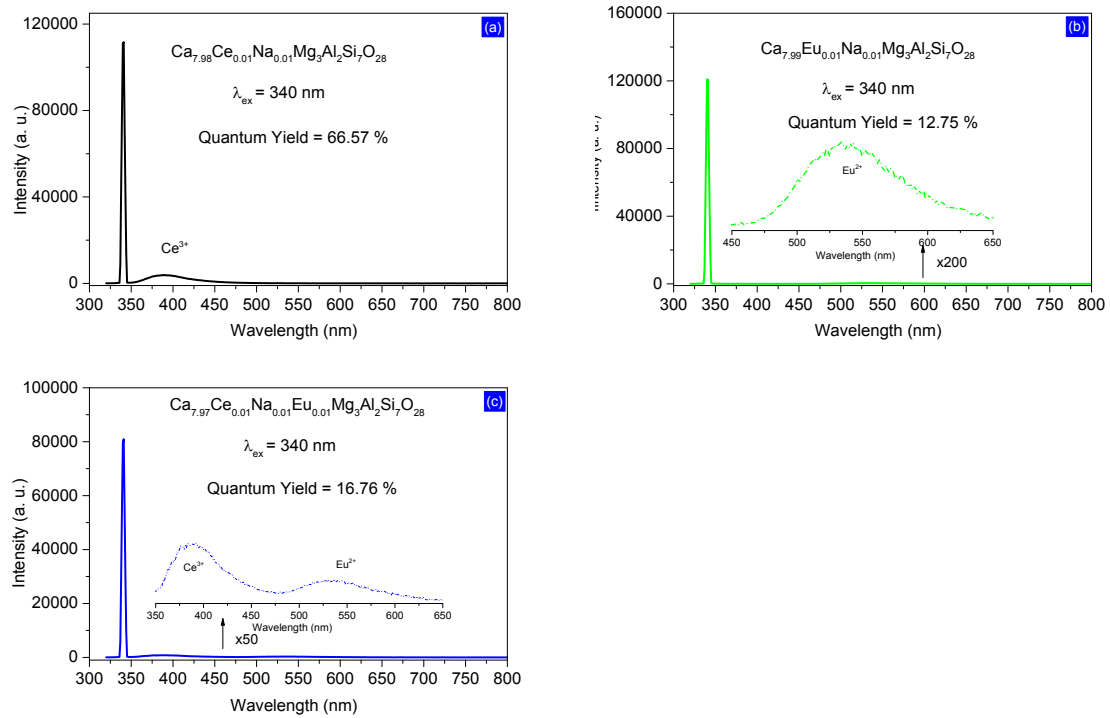

**Fig. S9** Emission spectra of  $\text{Ca}_{7.98}\text{Ce}_{0.01}\text{Na}_{0.01}\text{Mg}_3\text{Al}_2\text{Si}_7\text{O}_{28}$  (a),  $\text{Ca}_{7.99}\text{Eu}_{0.01}\text{Mg}_3\text{Al}_2\text{Si}_7\text{O}_{28}$  (b), and  $\text{Ca}_{7.97}\text{Ce}_{0.01}\text{Na}_{0.01}\text{Eu}_{0.01}\text{Mg}_3\text{Al}_2\text{Si}_7\text{O}_{28}$  (c) samples under the excitation at 340 nm in the integrated sphere.

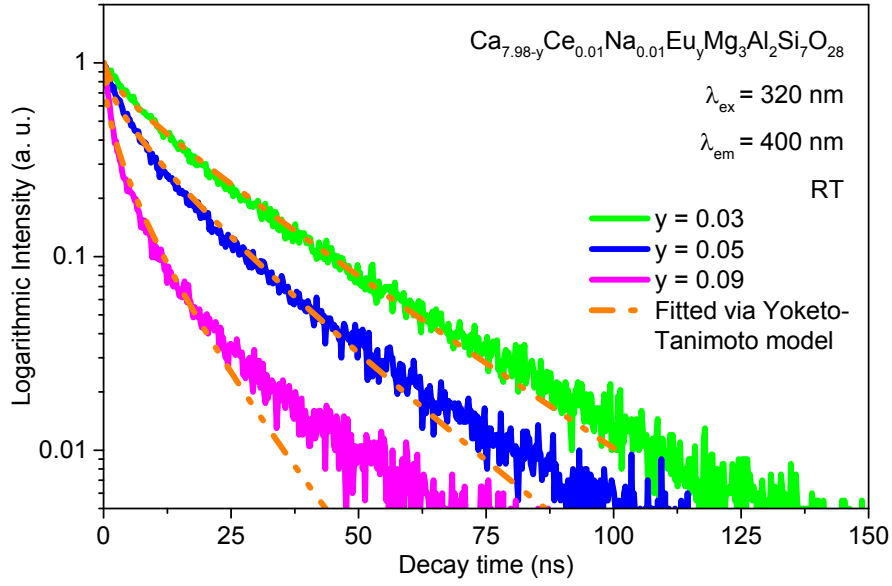

**Fig. S10** Decay curves ( $\lambda_{\text{ex}} = 320$  nm,  $\lambda_{\text{em}} = 400$  nm; RT) of  $\text{Ca}_{7.98-y}\text{Ce}_{0.01}\text{Na}_{0.01}\text{Eu}_y\text{Mg}_3\text{Al}_2\text{Si}_7\text{O}_{28}$  ( $y = 0.03, 0.05,$  and  $0.09$ ) samples and corresponding fitting results via Yokota-Tanimoto model.

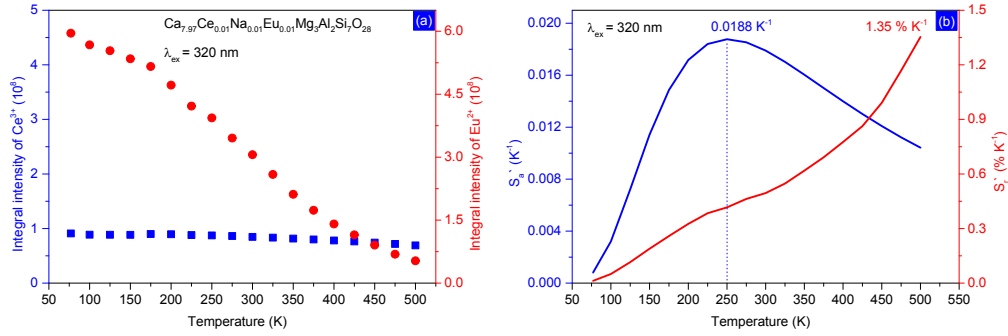

**Fig. S11** (a) Integral intensities of  $\text{Ce}^{3+}$  (350–460 nm) and  $\text{Eu}^{2+}$  (460–680 nm) in  $\text{Ca}_{7.97}\text{Ce}_{0.01}\text{Na}_{0.01}\text{Eu}_{0.01}\text{Mg}_3\text{Al}_2\text{Si}_7\text{O}_{28}$  at 77–500 K; (b) temperature sensitivities  $S_a'$  and  $S_r'$  values of phosphor  $\text{Ca}_{7.97}\text{Ce}_{0.01}\text{Na}_{0.01}\text{Eu}_{0.01}\text{Mg}_3\text{Al}_2\text{Si}_7\text{O}_{28}$  at 77–500 K under the excitation at 320 nm.

$$S_a' = \left| \frac{\partial(FIR)}{\partial(T)} \right| = \frac{D \cdot P \cdot \Delta E}{k_B T^2} \cdot \exp\left(\frac{-\Delta E}{k_B T}\right) \cdot \left[1 + P \cdot \exp\left(\frac{-\Delta E}{k_B T}\right)\right]^{-2}$$

(S3)

$$S_r = \left| \frac{\partial(FIR)}{FIR\partial(T)} \right| \times 100\% \quad (S4)$$

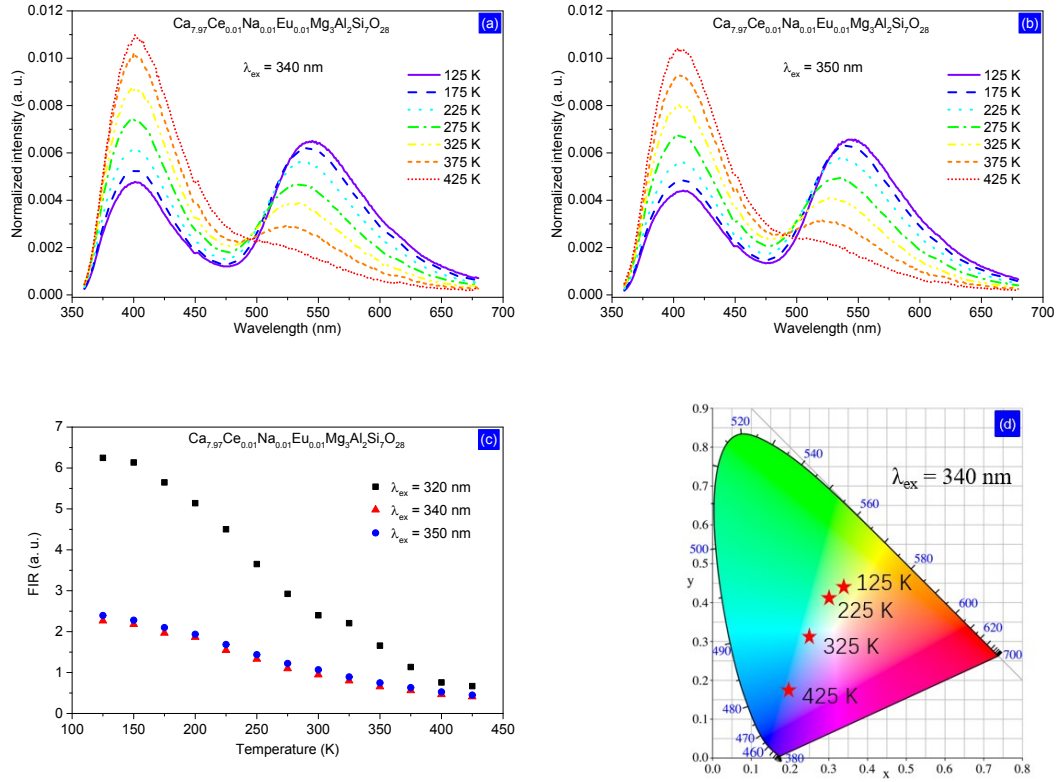

**Fig. S12** (a, b) Temperature-dependent normalized emission spectra (a,  $\lambda_{\text{ex}} = 340$  nm; b,  $\lambda_{\text{ex}} = 350$  nm) of  $\text{Ca}_{7.97}\text{Ce}_{0.01}\text{Na}_{0.01}\text{Eu}_{0.01}\text{Mg}_3\text{Al}_2\text{Si}_7\text{O}_{28}$ ; (c) temperature-dependent FIR values of  $\text{Ca}_{7.97}\text{Ce}_{0.01}\text{Na}_{0.01}\text{Eu}_{0.01}\text{Mg}_3\text{Al}_2\text{Si}_7\text{O}_{28}$  sample with excitations at 320, 340 and 350 nm; (d) CIE chromaticity coordinates (125–425 K) of  $\text{Ca}_{7.97}\text{Ce}_{0.01}\text{Na}_{0.01}\text{Eu}_{0.01}\text{Mg}_3\text{Al}_2\text{Si}_7\text{O}_{28}$  sample with excitation at 340 nm.
